# Supplementary material
Source: PubMed Central journal article supplement (PMC3549110)
Supplement: 1214550110_pnas.201214550SI.pdf [file 1214550110_pnas.201214550SI.pdf]

# Supporting Information

Korgaonkar et al. 10.1073/pnas.1214550110

## Materials and Methods

**Bacterial Strains and Media.** *Pseudomonas aeruginosa* strain PA14 and the isogenic PA0601 and *nagE* transposon insertion mutants were obtained from the PA14 nonredundant transposon mutant library (1) (<http://ausubellab.mgh.harvard.edu/cgi-bin/pa14/home.cgi>). Transposon insertions were confirmed by PCR. *P. aeruginosa* was routinely cultured in LB Miller broth/agar or morpholine-propanesulfonic acid (Mops)-buffered defined medium (2) containing 0.1% Socransky vitamin solution (3) and 10 mM succinate, hereby referred to as Mops-V. The ability to catabolize *N*-acetylgalactosamine (GalNAc) was tested by growth on Mops-buffered medium with 20 mM GlcNAc as the sole source of carbon. *Escherichia coli* DH5 $\alpha$  or *E. coli* XL1-Blue was cultured on LB Miller broth/agar. *Staphylococcus aureus* strain Mu50 (4) was routinely cultured on BHI broth/agar unless specified otherwise. All cultures were grown at 37 °C, shaking at 250 rpm. Antibiotics were used at the following concentrations: ampicillin, 100  $\mu$ g/mL; carbenicillin, 300  $\mu$ g/mL for plasmid selection and 150  $\mu$ g/mL for plasmid maintenance; gentamicin, 50  $\mu$ g/mL for *P. aeruginosa* transposon mutants.

**Screen for GlcNAc-Unresponsive Mutants.** For the screen, mutants arrayed in a 96-well plate format were inoculated into Mops-V supplemented with either 1 mM GlcNAc or 1 mM succinate. Strains were grown with shaking at 37 °C to stationary phase and pyocyanin levels estimated based on the intensity of the blue-green pigment of the culture. Those strains showing no change in the amount of pyocyanin produced in the medium containing GlcNAc compared with the medium lacking GlcNAc were selected. All strains identified in this primary screen were subsequently tested for levels of pyocyanin, lysis of Gram-positive bacteria, and growth with GlcNAc as the primary carbon source.

**Pyocyanin Analysis.** To quantify pyocyanin, *P. aeruginosa* strains were inoculated into Mops-V supplemented with either 1 mM succinate, 1 mM *N*-acetylmuramic acid, 1 mM GalNAc, 1 mM *N*-acetylneuraminic acid, 1 mM *N*-acetylglucosamine, or 330  $\mu$ g/mL peptidoglycan. Cells were grown to an OD<sub>600</sub> of 1.5, and pyocyanin was extracted and quantified from 1-mL cultures as previously described (5).

**PQS Extraction and Quantification.** *Pseudomonas* quinolone signal (PQS) was extracted from *P. aeruginosa* strains after growth in Mops-V supplemented with 1 mM GlcNAc, 1 mM succinate, or 330  $\mu$ g/mL peptidoglycan. Cells were grown to an OD<sub>600</sub> of 1.5 and were extracted three times with an equal volume of acidified ethyl acetate (150  $\mu$ L acetic acid per liter ethyl acetate; Fisher). Extracts were dried under a constant stream of N<sub>2</sub> gas, resuspended in methanol (Fisher), and analyzed by TLC as described previously (6, 7). PQS was identified by comigration with synthetic PQS standards (Syntech) and quantified by creating a standard curve using 150–500 ng PQS. PQS was visualized by fluorescence after excitation with long-wave UV light using a G: Box gel imager (Syngene).

**Quantification of Elastase Activity.** *P. aeruginosa* strains were assayed for elastase activity as previously described (8). Briefly, cells were grown in Mops-V supplemented with 1 mM GlcNAc, 1 mM succinate, or 330  $\mu$ g/mL peptidoglycan to an OD<sub>600</sub> of 1.5. Cell-free supernatants were collected by filtering whole-cell cultures using a 0.45- $\mu$ m filter (Corning). Supernatants were added to

1 mL of Elastin Congo Red (ECR; Sigma) substrate and incubated at 37 °C for 18 h with shaking. The ECR substrate is composed of 20 mg of Elastin Congo Red suspended in 1 mL buffer [0.1 M Tris·HCl (pH 7.2) and 1 mM CaCl<sub>2</sub>]. After 18 h, tubes were placed on ice, and the reaction was stopped by addition of 0.1 mL of 0.12 M EDTA. Insoluble ECR substrate was removed by centrifugation at 16,000  $\times$  g for 1 min and absorbance measurements taken at 495 nm.

**Gram-Positive Lysis Assays.** Lysis assays were performed by thoroughly swabbing a Brain Heart Infusion plate with an overnight culture of *S. aureus* Mu50. Plates were air dried, followed by placement of a 6-mm filter disk (Whatman) on the agar. Discs were spotted with 5  $\mu$ L of an overnight culture of *P. aeruginosa* strains, plates were incubated overnight at 37 °C, and zones of clearing measured.

**Complementation of the PA0601 Mutant.** The PA0601 gene was PCR amplified from *P. aeruginosa* chromosomal DNA using the primers listed in Table S2. The forward primer was designed such that the ribosome binding site upstream of PA0601 would be randomized during PCR. This procedure allows for optimization of expression for complementation and has been used by our group successfully in the past (9). The resulting 633-bp product was digested with SmaI and HindIII and ligated into SmaI/HindIII digested pEX1.8 (10). Five colonies of the resulting pEX1.8 plasmid containing pAK601 were pooled and transformed into the *P. aeruginosa* PA0601 mutant by magnesium chloride transformation (2). Transformants were screened for increased pyocyanin production after growth on Mops-V supplemented with either 1 mM GlcNAc or 1 mM succinate. The sequence of PCR-amplified PA0601 was confirmed by standard automated sequencing. The complementing clone of PA0601 possessed a ribosome binding site of 5'-CTGCT-3' modified from the WT PA0601 with a ribosome binding site of 5'-GGCAG-3'.

**Reverse Transcriptase PCR.** Total RNA was extracted from crops excised from flies infected with *P. aeruginosa* WT 48 h after infection using RNABee (Tel-Test) as previously described (11). cDNA synthesis was performed using SuperScript II reverse transcriptase as outlined by the manufacturer (Invitrogen). *P. aeruginosa* RNA (100 ng) served as the template for cDNA synthesis using 250 ng of the random primer (NS)<sub>5</sub>. Twenty nanograms of the resulting purified cDNA was used as template in the subsequent PCR amplification of *pqsA* and *clpX*. Primers used for PCR are listed in Table S2. For visualization, 5  $\mu$ L of the resulting PCR was subjected to agarose gel electrophoresis and stained with ethidium bromide.

***P. aeruginosa* Oral Infection of *Drosophila*.** *Drosophila melanogaster* were maintained on standard cornmeal molasses agar [1 L contains 8.2% (wt/vol) cornmeal, 2% (wt/vol) Brewer's yeast, 75 mL molasses, and 1.5% (wt/vol) agar with 0.35% propionic acid, and 0.3% tegosept]. The inoculum for oral infection of *Drosophila* was prepared as follows: *P. aeruginosa* strains grown overnight in LB were adjusted to an OD<sub>600</sub> of 2.0 in 1.5 mL followed by centrifugation at 5000  $\times$  g for 15 min to pellet cells. The supernatant was discarded and the pellet resuspended in 100  $\mu$ L of sterile 5% sucrose. The resuspended cells were spotted onto a sterile 21-mm filter (Whatman) that was placed on the surface of 5 mL of solidified 5% sucrose agar in a plastic vial (FlyBase). In some cases, 330  $\mu$ g/mL *S. aureus* peptidoglycan (Sigma) was added to the sucrose suspension before spotting onto









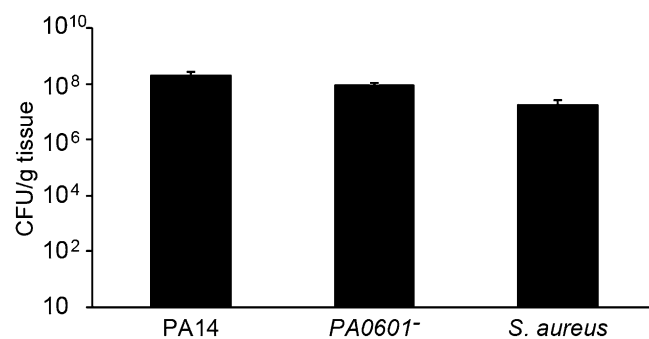

Fig. S5. Monoculture growth yields of WT *P. aeruginosa* (PA14), the PA0601 mutant (PA0601<sup>-</sup>), and *S. aureus* after 4 d in the murine wound infection model. Error bars represent SD,  $n = 6$ . The difference between WT *P. aeruginosa* and PA0601<sup>-</sup> was not statistically different as determined by Student *t* test,  $n = 6$ .

Table S1. GlcNAc-unresponsive *P. aeruginosa* mutants

| Strain*             | Gene*       | Description/function*                                           | Growth on GlcNAc <sup>†</sup> | Increased pyocyanin production <sup>‡</sup> | Enhanced <i>S. aureus</i> lysis <sup>§</sup> |
|---------------------|-------------|-----------------------------------------------------------------|-------------------------------|---------------------------------------------|----------------------------------------------|
| PA14                |             | WT                                                              | +                             | +                                           | +                                            |
| PA0266 <sup>-</sup> | <i>gabT</i> | 4-Aminobutyrate aminotransferase                                | +                             | -                                           | +                                            |
| PA0386 <sup>-</sup> |             | Putative oxygen-independent coproporphyrinogen III oxidase      | +                             | -                                           | +                                            |
| PA0601 <sup>-</sup> |             | Putative two-component response regulator                       | +                             | -                                           | -                                            |
| PA1031 <sup>-</sup> |             | Hypothetical protein                                            | +                             | -                                           | +                                            |
| PA1643 <sup>-</sup> |             | Putative ATPase                                                 | +                             | -                                           | +                                            |
| PA1746 <sup>-</sup> |             | Conserved hypothetical protein                                  | +                             | -                                           | +                                            |
| PA1943 <sup>-</sup> |             | Putative acetyltransferase                                      | +                             | -                                           | +                                            |
| PA1945 <sup>-</sup> |             | Putative sigma-54 dependent regulator                           | +                             | -                                           | +                                            |
| PA2211 <sup>-</sup> |             | Putative hydrolase                                              | +                             | -                                           | +                                            |
| PA2598 <sup>-</sup> |             | Putative flavin-dependent oxidoreductase                        | +                             | -                                           | +                                            |
| PA3761 <sup>-</sup> | <i>nagE</i> | Phosphotransferase system, GlcNAc-specific enzyme IIABC         | -                             | -                                           | -                                            |
| PA4231 <sup>-</sup> | <i>pchA</i> | Salicylate biosynthesis isochromate synthase                    | +                             | -                                           | +                                            |
| PA4319 <sup>-</sup> |             | Putative membrane protein                                       | +                             | -                                           | +                                            |
| PA5138 <sup>-</sup> |             | Putative ABC-type amino acid transporter, periplasmic component | +                             | -                                           | +                                            |

\*From [www.pseudomonas.com](http://www.pseudomonas.com).

<sup>†</sup>Strains were screened for their ability to catabolize GlcNAc, indicated by + for growth and - for no growth with GlcNAc as the sole carbon source;  $n = 3$ .

<sup>‡</sup>Increased pyocyanin levels in the presence of GlcNAc or peptidoglycan. +, Increase in pyocyanin production in the presence of GlcNAc or peptidoglycan; -, no change in pyocyanin levels in the presence of GlcNAc or peptidoglycan;  $n = 3$ .

<sup>§</sup>Lysis of *S. aureus* by *P. aeruginosa* determined using zone of clearing assay [1]. +, A zone of clearing similar to WT *P. aeruginosa*; -, a decreased zone of clearing;  $n = 3$ .

1. Korgaonkar AK, Whiteley M (2011) *Pseudomonas aeruginosa* enhances production of an antimicrobial in response to N-acetylglucosamine and peptidoglycan. *J Bacteriol* 193(4): 909-917.

**Table S2. Strains and plasmids used in this study**

| Strain or plasmid           | Genotype                                                                                                                                                                                                | Reference  |
|-----------------------------|---------------------------------------------------------------------------------------------------------------------------------------------------------------------------------------------------------|------------|
| <b>Plasmids</b>             |                                                                                                                                                                                                         |            |
| pEX1.8                      | Broad host range expression vector, Ap <sup>r</sup>                                                                                                                                                     | 1          |
| pAK601                      | pEX1.8 carrying PA0601                                                                                                                                                                                  | This study |
| pAKnagE                     | pEX1.8 carrying <i>nagE</i>                                                                                                                                                                             | This study |
| <b><i>E. coli</i></b>       |                                                                                                                                                                                                         |            |
| DH5 $\alpha$                | <i>endA1 hsdR17 supE44 thi-1 recA1 <math>\Delta</math>(lacZYA-argF) U169, deoR [<math>\Phi</math>80dlac <math>\Delta</math>(lacZ)M15]</i>                                                               | 2          |
| XL1Blue                     | <i>endA1 gyrA96(nal<sup>r</sup>) thi-1 recA1 relA1 lac glnV44 F'[:Tn10 proAB<sup>+</sup> lacI<sup>q</sup> <math>\Delta</math>(lacZ)M15] hsdR17(r<sub>K</sub><sup>-</sup> m<sub>K</sub><sup>+</sup>)</i> | Stratagene |
| <b><i>P. aeruginosa</i></b> |                                                                                                                                                                                                         |            |
| PA14                        | WT                                                                                                                                                                                                      | 3          |
| PA0601 <sup>-</sup>         | PA14 PA0601::Mar2xT7, Gm <sup>r</sup>                                                                                                                                                                   | 3          |
| <i>nagE</i> <sup>-</sup>    | PA14 <i>nagE</i> ::Mar2xT7, Gm <sup>r</sup>                                                                                                                                                             | 3          |
| <i>S. aureus</i> Mu50       | Methicillin-resistant <i>S. aureus</i>                                                                                                                                                                  | 4          |

- Pearson JP, et al. (1994) Structure of the autoinducer required for expression of *Pseudomonas aeruginosa* virulence genes. *Proc Natl Acad Sci USA* 91(1):197–201.
- Sambrook J, Fritsch EF, Maniatis T (1989) *Molecular Cloning: A Laboratory Manual* (Cold Spring Harbor Lab Press, Cold Spring Harbor, NY).
- Liberati NT, et al. (2006) An ordered, nonredundant library of *Pseudomonas aeruginosa* strain PA14 transposon insertion mutants. *Proc Natl Acad Sci USA* 103(8):2833–2838.
- Kuroda M, et al. (2001) Whole genome sequencing of methicillin-resistant *Staphylococcus aureus*. *Lancet* 357(9264):1225–1240.

**Table S3. Primers used in this study**

| Use/primer                                  | Sequence                       |
|---------------------------------------------|--------------------------------|
| Complementation of PA0601 <sup>-</sup>      |                                |
| 601-F                                       | TCCCCCGGGGAACAGCGTGNNNNNGCAAAG |
| 601-R                                       | CCCAAGCTTACCTGGCGCACAAGCCGCGAG |
| Complementation of <i>nagE</i> <sup>-</sup> |                                |
| <i>nagE</i> -F                              | TCCCCCGGGGAACAATCGNNNNNNACCGCC |
| <i>nagE</i> -R                              | CCCAAGCTTTTGCCGGGGTCCAGCCCTCC  |
| RT-PCR                                      |                                |
| <i>pqsA</i> -F                              | CAGCCTGGTGGTACGTGAAG           |
| <i>pqsA</i> -R                              | GCCAGGCGCACGCTGCTCAAC          |
| <i>clpX</i> -F                              | CCGCGAGGAGGTGCAGGAAGC          |
| <i>clpX</i> -R                              | GAGGCAACGGTGCCTCGATG           |

Restriction sites are underlined.
